# Supplementary material for: Non-equilibrium partial oxidation of TiN surface for efficient visible-light-driven hydrogen production
Source: Royal Society of Chemistry journal article supplement (doi:10.1039/c2jm30662j), 2012-01-01
Supplement: c2jm30662j.pdf [file c2jm30662j.pdf]

## Electronic Supporting Information

### Non-equilibrium partial oxidation of TiN surface for efficient visible-light-driven hydrogen production

Peng Zheng,<sup>†,‡</sup> Jianghong Zhao,<sup>†</sup> Jianfeng Zheng,<sup>†</sup> Guixiang Ma,<sup>†,‡</sup> Zhenping  
Zhu<sup>\*,†</sup>

<sup>†</sup>State Key Laboratory of Coal Conversion, Institute of Coal Chemistry, Chinese Academy of Sciences,  
Taiyuan 030001, China, <sup>‡</sup>Graduate University of Chinese Academy of Sciences, Beijing 100049, China

This supporting information contains Figures S1-S6, and Table S1.

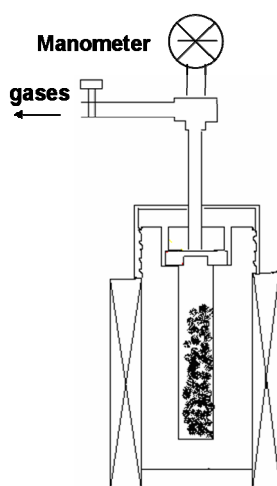

**Figure S1.** Schematic drawing of sealed stainless steel reactor for TiN non-equilibrium partial oxidation.

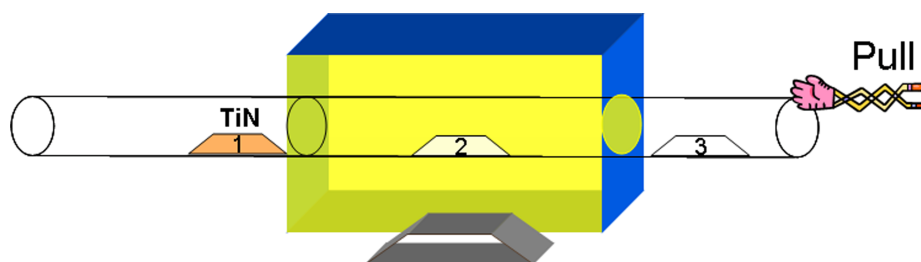

**Figure S2.** Schematic drawing of the flash oxidation of TiN particles. For detailed performance procedure, see experimental section.

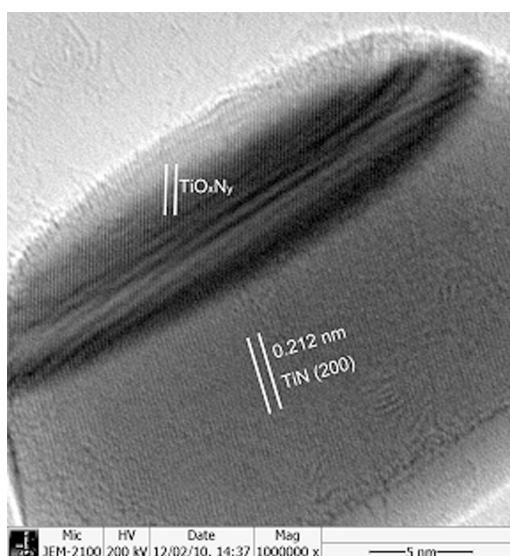

**Figure S3.** Typical HRTEM image of the TiO<sub>x</sub>N<sub>y</sub>@TiN particles at TNP-TiN.

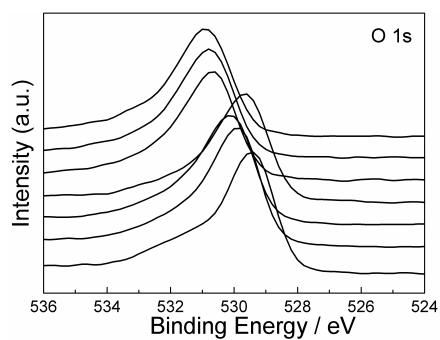

**Figure S4.** High-resolution O 1s XPS spectrum upon Ar<sup>+</sup> sputtering.

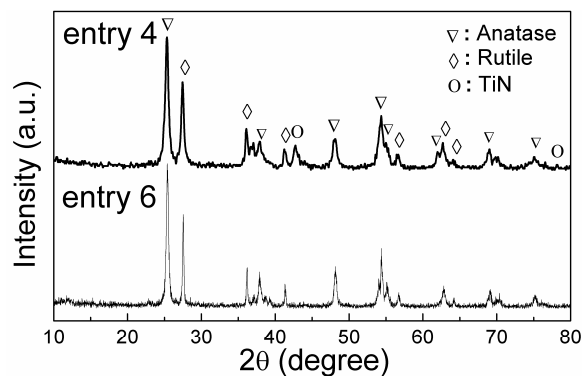

**Figure S5.** Typical XRD patterns of the samples obtained by flash oxidation of TiN, at entry 4 and entry 6 in table S1.

**Table S1.** Preparation parameters and H<sub>2</sub> evolution rate of the flash oxidation samples

| Sample No. | Temp. (°C) | Reaction duration (s) | Oxidation degree <sup>a</sup>                                                                | Hydrogen Evolution (μmolg <sup>-1</sup> h <sup>-1</sup> ) |
|------------|------------|-----------------------|----------------------------------------------------------------------------------------------|-----------------------------------------------------------|
| 1          | 650        | 10                    | No reaction                                                                                  | 0                                                         |
| 2          | 750        | 8                     | TiO <sub>x</sub> N <sub>y</sub> , undetected;<br>TiO <sub>2</sub> , little                   | 7                                                         |
| 3          | 800        | 5                     | TiO <sub>x</sub> N <sub>y</sub> , undetected;<br>TiO <sub>2</sub> , little                   | 9                                                         |
| 4          | 800        | 8                     | TiO <sub>x</sub> N <sub>y</sub> , undetected;<br>TiN, little;<br>TiO <sub>2</sub> , dominant | 14                                                        |
| 5          | 800        | 15                    | TiO <sub>x</sub> N <sub>y</sub> , undetected;<br>TiN, little;<br>TiO <sub>2</sub> , dominant | 5                                                         |
| 6          | 800        | 60                    | Completely converted to TiO <sub>2</sub>                                                     | 0                                                         |

a: the data obtained from XRD observation.
